# Supplementary material for: Selective electrodissolution of inorganic ions/DNA multilayer film for tunable DNA release
Source: Royal Society of Chemistry journal article supplement (doi:10.1039/b812940a), 2008-11-19
Supplement: b812940a.pdf [file b812940a.pdf]

## Supporting Information

### Selective Electrodeposition of inorganic ions/DNA multilayer film for tunable DNA release

Fuan Wang, Xiaoqing Liu, Gaiping Li, Dan Li and Shaojun Dong\*

State Key laboratory of Electroanalytical Chemistry, Changchun Institute of Applied Chemistry, Graduate School of the Chinese Academy of Sciences, Chinese Academy of Sciences, Changchun, China. Fax: +86 431 5689711; Tel: +86 431 5262101; E-mail: [dongsj@ciac.jl.cn](mailto:dongsj@ciac.jl.cn)

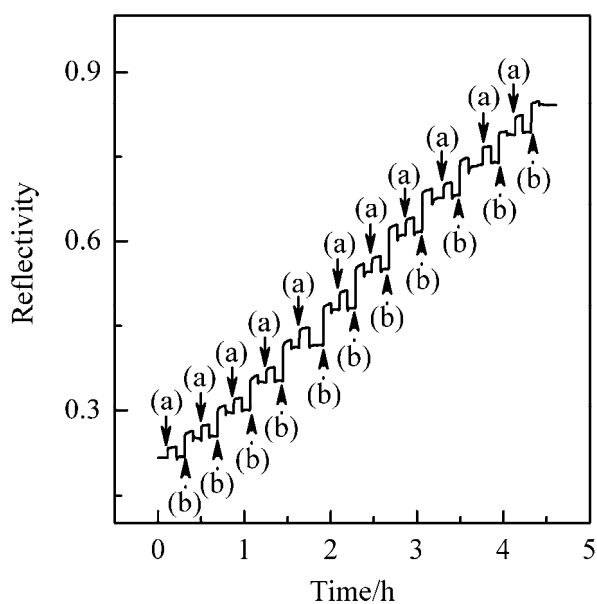

**Fig. S1** In situ SPR R-t mode monitoring the construction of  $(\text{Zr}^{4+}/\text{DNA})_{11}$  LbL films. SPR angle was fixed at  $62^\circ$  and kept unchanged. During the preparation of the LbL film, the film was rinsed in the water between the alternated assemblies of  $\text{Zr}^{4+}$  (a) and DNA (b) on MUA modified SPR gold thin film.

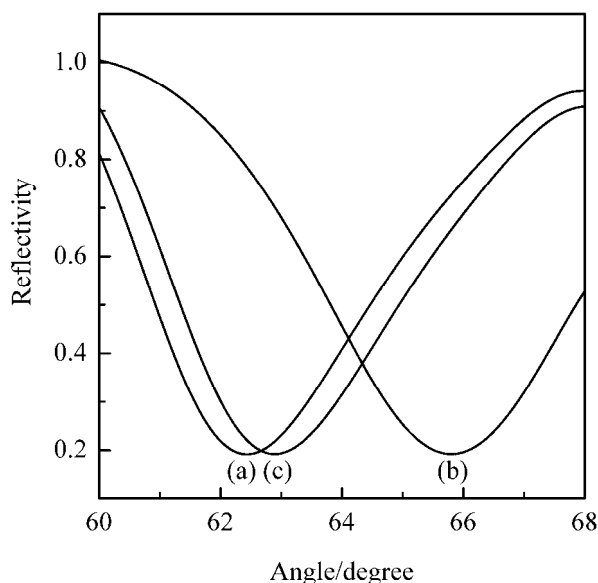

**Fig. S2** In situ scanning SPR curves of the  $(\text{Zr}^{4+}/\text{DNA})_{11}$  films before (b) and after (c) the selective electrodisassembly on the MUA modified SPR gold thin film (a). All curves were recorded in pure water after washing.

**Figure S2** shows the scanning SPR spectra of the MUA-modified, negatively charged gold thin film, curve a, after assembly of  $(\text{Zr}^{4+}/\text{DNA})_{11}$  LbL film, curve b, and after complete electrodisassembly for 2 h, curve c. After formation of  $(\text{Zr}^{4+}/\text{DNA})_{11}$  LbL film, the reflectance minimum is right-shifted by ca.  $3.36^\circ$  in comparison to the basal surface. Upon electrochemical disassembly of the films, the reflectance minimum is left-shift by  $2.92^\circ$ , indicating that 86.9% of the original film has been released from the surface. This is consistent with SPR R-t mode measurement.

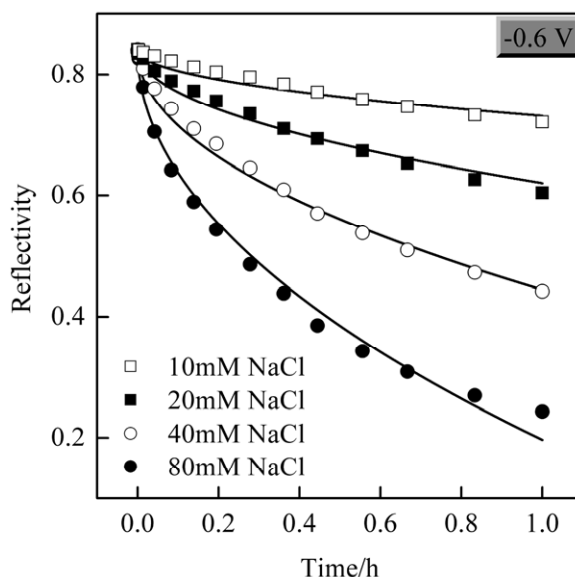

**Fig. S3** In situ SPR R–t monitoring DNA release kinetics from  $(\text{Zr}^{4+}/\text{DNA})_{11}$  film by the application of electric potential ( $-0.6\text{ V}$  vs  $\text{Ag}/\text{AgCl}$ ) in 10 ( $\square$ ), 20 ( $\blacksquare$ ), 40 ( $\circ$ ), and 80 mM ( $\bullet$ ) sodium chloride solution (pH 7.0). Only several points of SPR R–t monitoring curve are shown in this figure. A mathematical fitting of the disassembly curve is drawn as a solid line. The fixed angle is  $62^\circ$  and the angle position holds unchanged. A relative reflectivity of 100% represents the existence of original  $(\text{Zr}^{4+}/\text{DNA})_{11}$  film, while 0% designates the SPR gold thin films.

**Table 1.** Parameters of the mathematical fitting that was used to fit the disassembly profiles (measured by SPR) of the  $\text{Zr}^{4+}/\text{DNA}$  multilayer film shown in **Figure S3**.<sup>1</sup>

| Concentration of NaCl<br>[mM] | Mathematical fitting parameters                              |                 |
|-------------------------------|--------------------------------------------------------------|-----------------|
|                               | $R=R_0-R_s t^{1/2}$ , $R_s=2k\pi^{1/2}D_z^{1/2}\Delta R_z^*$ |                 |
|                               | $100\times R_0$                                              | $100\times R_s$ |
| 10                            | 84.2                                                         | 0.194           |
| 20                            | 84.2                                                         | 0.389           |
| 40                            | 84.2                                                         | 0.698           |
| 80                            | 84.2                                                         | 1.14            |

<sup>1</sup> The coefficient of determination ( $R^2$ ) was higher than 0.95 for all fitted curves.

The mathematical fitting the electrodisassembly kinetics of DNA-containing multilayer films was based on the following deduction:

Assuming that the disassembly rate is proportional to the concentration of  $Zr^{4+}$  (degree of the disrupted films electroneutrality) at the electrode surface, the time differential of SPR reflectance ( $\partial R/\partial t$ , a symbol of the disassembly rate) can be correlated with the concentration of surface-confined  $Zr^{4+}$ , as shown by eq 1,

$$\frac{\partial R}{\partial t} = -kC_z(t) \frac{\Delta R_z^*}{C_z^*} \dots\dots\dots (1)$$

where  $k$  is a positive constant,  $C_z(t)$  is the concentration of  $Zr^{4+}$  at the electrode surface at time  $t$ ,  $C_z^*$  is the bulk concentration of  $Zr^{4+}$  and  $\Delta R_z^*$  is the SPR reflectance variation of the multilayer films. As a constant,  $\Delta R_z^*/C_z^*$  is also used to simplify  $k$  and the following deduction.

According to Cottrell equation<sup>1</sup> (eq 2),

$$C_z(t) = \frac{i(t)}{nFA} = \frac{D_z^{1/2} C_z^*}{\pi^{1/2} t^{1/2}} \dots\dots\dots (2)$$

where  $D_z$  is the diffusion coefficient of  $Zr^{4+}$ . The depletion of  $Zr^{4+}$  near the surface shows an inverse  $t^{1/2}$  function in potential-step experiments under diffusion control. It is a mark of diffusive control over the rate of electrolysis.<sup>2-4</sup> Combining this result and eq 1, then we have

$$\frac{\partial R}{\partial t} = -k \frac{D_z^{1/2} \Delta R_z^*}{\pi^{1/2} t^{1/2}} \dots\dots\dots (3)$$

Thus,

$$R = R_0 - 2k\pi^{-1/2} D_z^{1/2} \Delta R_z^* t^{1/2} = R_0 - R_s \sqrt{t} \dots\dots\dots (4)$$

$$R_s = 2k\pi^{-1/2} D_z^{1/2} \Delta R_z^* \dots\dots\dots (5)$$

where  $R_0$  and  $R_s$  are constants. As is clearly shown in eq 5,  $R_s$  is proportional to the diffusion coefficient of  $Zr^{4+}$  ( $D_z$ ).

It must be note that the above deduced equation was based on two assumptions: one is the disassembly rate is proportional to the concentration of  $Zr^{4+}$  at the electrode surface. The other is the diffuse layer thickness of the electroactive species is far thicker than that of the electroactive species-containing films.<sup>5</sup> During the selective electrodisassembly, the  $Zr^{4+}$ /DNA multilayer film is not steady and the distribution of  $Zr^{4+}$  is more complex. So the proposed equation can only provide a

semiquantitative analysis of the diffusion coefficient of  $Zr^{4+}$  ( $D_z$ ). In addition, SPR reflectance ( $R$ ) should have an inverse  $t^{1/2}$  function in the present mathematical fitting procedure while the experimental SPR reflectance shows an exponential-like decay with time. It is appropriate to fit the experimental SPR reflectance curves at a short time at the beginning of electrodisassembly.

Then we carried out mathematical fitting of the disassembly curves by using the above deduced equation. As shown in **Fig. 3S** and **Table 1**,  $R_s$  is increasing with the concentration of NaCl. As the diffusion coefficient of  $Zr^{4+}$  ( $D_z$ ) is proportional to  $R_s$ , it is demonstrated that the ion diffusion coefficient value increased in high concentration of sodium chloride electrolyte. In other words, the electrochemical accumulation rate of  $Zr^{4+}$  to gold thin film could be faster when the multilayer film was immersed in high concentrations of sodium chloride.

## Reference

1. F. G. Cottrell, *Z. Phys. Chem.* 1903, **42**, 385.
2. Allen J. Bard and L. R. Faulkner, *Electrochemical Methods: Fundamentals and Applications*, John Wiley & Sons, Inc., New York, 2000.
3. P. Daum, J. R. Lenhard, D. Rolinson and R. W. Murray, *J. Am. Chem. Soc.* 1980, **102**, 4649.
4. C. R. Martin, I. Rubinstein and A. J. Bard, *J. Am. Chem. Soc.* 1982, **104**, 4817.
5. S. J. Dong, G. J. Che and Y. W. Xie, *Chemically Modified Electrodes*, 2nd ed. Chinese Science Press, Beijing, 2003.
